# Supplementary material
Source: PubMed Central journal article supplement (PMC3832273)
Supplement: 83038fb7b475c72879ff975f549d30d6_genetics.113.155846-5.pdf [file 83038fb7b475c72879ff975f549d30d6_genetics.113.155846-5.pdf]

**Table S2 Genes identified as differentially expressed in MAT $\alpha$  and MAT $\alpha$ -playing-a cells using RNA sequencing**

| Gene                                                                                   | Log <sub>2</sub> Fold Change:        |                                    |
|----------------------------------------------------------------------------------------|--------------------------------------|------------------------------------|
|                                                                                        | Unstimulated MAT $\alpha$ -playing-a | Stimulated MAT $\alpha$ -playing-a |
|                                                                                        | ÷                                    | ÷                                  |
|                                                                                        | Unstimulated MAT $\alpha$            | Stimulated MAT $\alpha$            |
| <i>MAT<math>\alpha</math>1</i>                                                         | <b>7.56*</b>                         | <b>7.86*</b>                       |
| <i>YCR097W-A</i>                                                                       | <b>3.97*</b>                         | <b>6.96*</b>                       |
| <i>YDR008C</i>                                                                         | <b>4.30*</b>                         | <b>5.70*</b>                       |
| <i>SAG1</i>                                                                            | <b>3.63*</b>                         | <b>5.49*</b>                       |
| <i>YCL065W</i>                                                                         | <b>2.91*</b>                         | <b>5.33*</b>                       |
| <i>TRP1</i>                                                                            | <b>4.35*</b>                         | <b>5.31*</b>                       |
| <i>MAT<math>\alpha</math>2</i>                                                         | <b>1.28*</b>                         | <b>3.08*</b>                       |
| <i>YLR040C</i>                                                                         | <b>3.41*</b>                         | <b>2.38*</b>                       |
| <i>YLR041W</i>                                                                         | <b>3.21*</b>                         | <b>2.03*</b>                       |
| <i>YML131W</i>                                                                         | 0.66*                                | 0.69*                              |
| <i>TPO2</i>                                                                            | -0.74*                               | 0.53*                              |
| <i>YPR158C-D</i>                                                                       | -0.61*                               | -0.48*                             |
| <i>ADE17</i>                                                                           | -0.75*                               | -0.48*                             |
| <i>BAP2</i>                                                                            | -0.94*                               | -0.54*                             |
| <i>FSF1</i>                                                                            | -0.64*                               | -0.58*                             |
| <i>ILV3</i>                                                                            | -0.75*                               | -0.58*                             |
| <i>GDH1</i>                                                                            | -0.87*                               | -0.60*                             |
| <i>FIT3</i>                                                                            | -0.84*                               | -0.63*                             |
| <i>ALD5</i>                                                                            | <b>-1.03*</b>                        | -0.88*                             |
| <i>BAT1</i>                                                                            | <b>-1.70*</b>                        | <b>-1.20*</b>                      |
| <i>OAC1</i>                                                                            | <b>-2.27*</b>                        | <b>-1.57*</b>                      |
| <i>LEU1</i>                                                                            | <b>-2.47*</b>                        | <b>-1.82*</b>                      |
| <i>ADE2</i>                                                                            | <b>-1.38*</b>                        | <b>-1.93*</b>                      |
| <i>GYP8</i>                                                                            | <b>-1.02*</b>                        | <b>-2.05*</b>                      |
| <i>STE2</i>                                                                            | <b>-2.67*</b>                        | <b>-2.18*</b>                      |
| <i>MFA1</i>                                                                            | <b>-1.23*</b>                        | <b>-2.80*</b>                      |
| <i>YNL146C-A</i>                                                                       | <b>-2.57*</b>                        | <b>-4.00*</b>                      |
| <i>MFA2</i>                                                                            | <b>-5.51*</b>                        | <b>-6.85*</b>                      |
| <i>ASG7</i>                                                                            | <b>-2.68*</b>                        | <b>-9.11*</b>                      |
| <i>AGA2</i>                                                                            | <b>-7.29*</b>                        | <b>-9.28*</b>                      |
| <b>Genes whose expression changed significantly only in pheromone-stimulated cells</b> |                                      |                                    |
| <i>YHR145C</i>                                                                         | -0.61                                | <b>3.63*</b>                       |

|                |             |              |
|----------------|-------------|--------------|
| <i>YCR041W</i> | <b>2.14</b> | <b>3.53*</b> |
| <i>PCL1</i>    | -0.12       | <b>1.85*</b> |
| <i>SNL1</i>    | 0.05        | <b>1.75*</b> |
| <i>YLR346C</i> | <b>1.20</b> | <b>1.70*</b> |
| <i>TOS6</i>    | -0.03       | <b>1.30*</b> |
| <i>INO1</i>    | 0.16        | <b>1.30*</b> |
| <i>PST1</i>    | -0.06       | <b>1.16*</b> |
| <i>OYE3</i>    | -0.22       | <b>1.05*</b> |
| <i>TOS4</i>    | -0.04       | <b>1.03*</b> |
| <i>YOX1</i>    | -0.12       | 0.97*        |
| <i>IMD2</i>    | 0.02        | 0.95*        |
| <i>PIR3</i>    | 0.47        | 0.95*        |
| <i>LEU2</i>    | 0.21        | 0.91*        |
| <i>SPO11</i>   | 0.05        | 0.88*        |
| <i>MCD1</i>    | 0.07        | 0.87*        |
| <i>HES1</i>    | 0.29        | 0.85*        |
| <i>GRE2</i>    | 0.13        | 0.80*        |
| <i>AAD16</i>   | 0.00        | 0.80*        |
| <i>YJL218W</i> | 0.41        | 0.79*        |
| <i>YGL230C</i> | 0.05        | 0.78*        |
| <i>AAD6</i>    | 0.03        | 0.77*        |
| <i>EGT2</i>    | 0.12        | 0.76*        |
| <i>YJR154W</i> | 0.19        | 0.74*        |
| <i>MCH2</i>    | 0.35        | 0.73*        |
| <i>HTA2</i>    | -0.17       | 0.73*        |
| <i>YDR134C</i> | 0.06        | 0.69*        |
| <i>PIR1</i>    | -0.11       | 0.69*        |
| <i>KDX1</i>    | 0.52        | 0.68*        |
| <i>HSP31</i>   | 0.22        | 0.68*        |
| <i>YGR035C</i> | 0.17        | 0.66*        |
| <i>APL1</i>    | 0.07        | 0.66*        |
| <i>YNR064C</i> | 0.02        | 0.64*        |
| <i>YBR071W</i> | -0.04       | 0.63*        |
| <i>HAL1</i>    | 0.48        | 0.62*        |
| <i>YOL159C</i> | 0.04        | 0.62*        |
| <i>CRG1</i>    | 0.22        | 0.62*        |
| <i>YNL134C</i> | -0.04       | 0.60*        |
| <i>AAD10</i>   | -0.15       | 0.60*        |
| <i>SVS1</i>    | -0.09       | 0.59*        |

|                  |       |        |
|------------------|-------|--------|
| <i>SPI1</i>      | 0.44  | 0.58*  |
| <i>YDR034W-B</i> | -0.51 | 0.57*  |
| <i>RNR1</i>      | 0.07  | 0.56*  |
| <i>SRL3</i>      | 0.08  | 0.56*  |
| <i>YNL058C</i>   | 0.21  | 0.55*  |
| <i>YKE4</i>      | -0.02 | 0.54*  |
| <i>ACA1</i>      | 0.28  | 0.52*  |
| <i>SSA4</i>      | -0.10 | 0.50*  |
| <i>HHF1</i>      | -0.09 | 0.50*  |
| <i>DSE4</i>      | 0.29  | 0.48*  |
| <i>OAZ1</i>      | 0.13  | 0.47*  |
| <i>SEO1</i>      | 0.24  | 0.47*  |
| <i>NIS1</i>      | -0.11 | 0.47*  |
| <i>YEH1</i>      | 0.01  | 0.46*  |
| <i>HXT1</i>      | -0.08 | -0.47* |
| <i>PHO12</i>     | -0.24 | -0.50* |
| <i>YOL103W-B</i> | -0.31 | -0.50* |
| <i>SIT1</i>      | -0.46 | -0.51* |
| <i>PHO11</i>     | -0.24 | -0.52* |
| <i>ENA1</i>      | 0.00  | -0.52* |
| <i>LEU9</i>      | -0.22 | -0.52* |
| <i>HIS4</i>      | -0.50 | -0.52* |
| <i>YPL257W-B</i> | -0.31 | -0.53* |
| <i>ALT2</i>      | -0.20 | -0.54* |
| <i>PDH1</i>      | 0.08  | -0.56* |
| <i>PRY2</i>      | -0.29 | -0.57* |
| <i>HXK1</i>      | -0.03 | -0.57* |
| <i>TAT1</i>      | -0.35 | -0.57* |
| <i>YJR003C</i>   | -0.15 | -0.66* |
| <i>THI22</i>     | -0.26 | -0.81* |
| <i>FET3</i>      | -0.32 | -0.83* |
| <i>AXL1</i>      | -0.52 | -0.93* |

---

**Genes whose expression changed significantly only in unstimulated cells**

---

|               |              |             |
|---------------|--------------|-------------|
| <i>RDN5-2</i> | <b>2.90*</b> | <b>1.33</b> |
| <i>RDN5-5</i> | <b>2.75*</b> | 0.73        |
| <i>RDN5-4</i> | <b>2.66*</b> | <b>1.02</b> |
| <i>RDN5-3</i> | <b>2.51*</b> | 0.93        |
| <i>RDN5-1</i> | <b>2.34*</b> | 0.99        |
| <i>RDN5-6</i> | <b>2.34*</b> | 0.99        |

|                |               |       |
|----------------|---------------|-------|
| <i>YLR042C</i> | 0.66*         | 0.31  |
| <i>HER1</i>    | 0.64*         | 0.15  |
| <i>HAP4</i>    | 0.55*         | 0.23  |
| <i>YJL171C</i> | -0.59*        | -0.20 |
| <i>DRE2</i>    | -0.59*        | -0.19 |
| <i>HMX1</i>    | -0.64*        | -0.32 |
| <i>GAP1</i>    | -0.64*        | -0.25 |
| <i>ARN2</i>    | -0.65*        | -0.41 |
| <i>FUS1</i>    | -0.65*        | -0.06 |
| <i>MAE1</i>    | -0.70*        | -0.15 |
| <i>AGA1</i>    | -0.85*        | -0.15 |
| <i>FIT2</i>    | -0.89*        | -0.40 |
| <i>ISU2</i>    | -0.92*        | -0.28 |
| <i>YGP1</i>    | <b>-1.04*</b> | -0.10 |
| <i>DIC1</i>    | <b>-1.26*</b> | -0.28 |

---

\* Indicates statistical significance determined by the default settings in Cufflinks ( $p < 0.001$ ) (Trapnell *et al.* 2010). Numbers in bold indicate that there is a greater than two-fold change between the expression of the gene in *MAT $\alpha$* -playing-a and *MATa* cells.

#### LITERATURE CITED

Trapnell, C., B. A. Williams, G. Pertea, A. Mortazavi, G. Kwan *et al.*, 2010 Transcript assembly and quantification by RNA-seq reveals unannotated transcripts and isoform switching during cell differentiation. *Nat. Biotechnol.* **28**: 511-515.
