# Supplementary material
Source: PubMed Central journal article supplement (PMC3832273)
Supplement: dbcda08e847f8aa1ab1d7e3d09e2df48_genetics.113.155846-7.pdf [file dbcda08e847f8aa1ab1d7e3d09e2df48_genetics.113.155846-7.pdf]

### File S1

To measure unstimulated  $\alpha$ -factor production, cells were grown to log phase ( $\sim 5 \times 10^6$  cells/mL), washed into YPD + 0.1% BSA, and resuspended in BSA-coated culture tubes at  $5 \times 10^6$  cells/mL in YPD + 0.1% BSA. The supernatant of the media was then harvested after a 15 minute, 30 minute, or 120 minute incubation at 30°C on a roller drum using BSA-coated 1mL syringes (BD, Franklin Lakes, NJ) and filtered through 0.45 $\mu$ m BSA-coated syringe filters (Pall Corporation, Port Washington, NY).  $5 \times 10^5$  log phase *MATa bar1 $\Delta$*  cells were then incubated in 1x, 0.5x, and 0.2x dilutions of the supernatant for 2 hours, sonicated, fixed using 60% ethanol at -20°C, and resuspended into 20% glycerol in phosphate buffered saline (PBS). The percent of the cells shmooing was counted and compared to a calibration curve produced by treating *MATa bar1 $\Delta$*  cells with different concentrations of synthetic  $\alpha$ -factor.

Stimulated  $\alpha$ -factor production was measured in the same way except that the cells being tested were grown to log phase ( $\sim 5 \times 10^6$  cells/mL), counted, washed into YPD + 0.1% BSA, and  $5 \times 10^6$  cells/mL of the cells being tested were mixed with  $5 \times 10^5$  cells/mL *MATa bar1 $\Delta$*  cells. After 2 hours incubation at 30°C on roller drums, the cells were washed into fresh YPD + 0.1% BSA and put into BSA-coated culture tubes. The supernatant was then harvested and analyzed as described above.

To generate a standard curve, *MATa bar1 $\Delta$*  cells were incubated in integer values of synthetic  $\alpha$ -factor concentrations between 0nM and 7nM, and the best fit line was generated with an  $R^2$  of 0.9 to determine a constant (K) for the relationship between  $\alpha$ -factor concentration and the percentage of shmooos ( $K=0.07$ ).  $\alpha$ -factor production in molecules/cell/minute was then determined by  $\frac{N \times K \times \% \text{ shmooos} \times \text{volume}}{r \times 2^D \times t \times l}$ , where  $N$  is Avagadro's constant,  $r$  is the starting number of cells,  $D$  is the number of doublings expected,  $t$  is the incubation time, and  $l$  is the dilution. The expected number of doublings was calculated by the incubation time divided by an expected 90 minute doubling time for yeast.

Culture tubes and syringes were BSA-coated by incubating overnight at 4°C with PBS + 2% BSA. The PBS + 2% BSA was poured out immediately prior to use of the culture tube or syringe. Filters were BSA-coated by filtering 1mL of PBS + 2% BSA through them prior to use. At least 200 cells were counted to determine the percentage of cells shmooing. Error bars are standard deviations. Statistical significance was determined using Student's  $t$ -test.
